# Supplementary material
Source: Research Square preprint supplement (doi:10.21203/rs.3.rs-9392047/v1)
Supplement: Supplementary file 1 [file 19b98fe20bcc5f7027d25e1d.docx]

**The efficacy of cognitive behavioral therapy (CBT) in improving emotion regulation and self-injurious behavior in adolescents with non-suicidal self-injury (NSSI)**

**Supplementary process**

***Materials***

Participants completed the self-generated reappraisal eye-tracking paradigm adapted from Qi et al. to suit our current study (Qi et al., 2020). The experiment comprised 12 neutral and 36 negative images selected from the International Affective Picture System (IAPS) (Lang, Bradley, & Cuthbert, 2008). The types of negative images included threatening animals, angry faces, and violent behaviors, as well as stationary objects, neutral faces, and people doing ordinary activities. Neutral stimuli played a role in preventing individual habituation.

To prevent cultural differences impairing the experimental results, we recruited 20 healthy Chinese students without vision problems (*M*=19.67, S.D.=1.54) to complete the test. A significant difference was discovered between neutral and negative pictures in valence (neutral: 5.23±0.51, negative: 3.02±0.82, *p*<0.001) as well as arousal (neutral: 3.24±0.56, negative: 5.42±0.84, *p*<0.001). However, similar results were not found (valence: *F* (2,33) =0.257, *p*=0.761; arousal: *F* (2,33) =0.501, *p*=0.610) in this comparison when negative pictures were divided into three sets of twelve according to the above two indicators. Therefore, these selected pictures were suitable for our present study.

Participants passing the preliminary visual correction test indicated the start of the experiment. Each trial started with a white fixation cross for 500 ms to 1,000 ms. Next, a cue was introduced for 3 seconds to hint those one of four strategies (i.e., view neutral, view negative, reappraisal, or distraction) would be used. Following this, neutral or negative pictures were randomly presented on the computer's screen for 4 seconds. After that, two nine-point visual analog scales were successively shown, and participants were asked to rate valence (where 1=extremely negative, and 9=extremely positive) and arousal (where 1=extremely calm, and 9=extremely excited) for the previous image. Participants waited for 2 seconds after ending the assessment operation to enter the next trial.

The eye-tracking task consisted of 48 trials, 12 trials for each block. The instructions to view neutral and view negative images were assigned equally in each block. The reappraisal and distraction intervals occurred in four blocks with a balanced number of instructions. Furthermore, a random sequence of trials occurred within the blocks. After all the trials, the participants reported whether the reappraisal or distraction strategies were successfully administered, using a visual analog scale (ranging from 1 to 10, i.e., from not at all successful to very successful). The effort expended to carry out the strategies was assessed on a computerized 10-point rating scale (i.e., from no effort at all to great effort).

***Emotional areas of interest***

We defined the emotional areas of interest (e-AOI) through two tasks that imitated previous procedures (Strauss, Ossenfort, & Whearty, 2016). In the first task, participants (the 20 college students mentioned earlier) were asked to view naturally 36 negative pictures while their eye movements were recorded. Each image was shown for 4 seconds. After the free viewing task, participants were required to use the smallest possible oval to cover the emotive areas of the images in Microsoft PowerPoint for an unlimited time. The drawing ended when they no longer reported unpleasant feelings while viewing these images. These data were aggregated to fashion a two-dimensional matrix for each image. BeGaze software was utilized to create the Grid AOIs that included the mean fixation time and fixation counts across each pixel. The Grid AOIs were combined with the two-dimensional matrixes to create the e-AOI for each image to ensure that all e-AOIs held negative valence for most participants.

The follow-up task was for two independent researchers to draw and evaluate the e-AOI for each image. There was no significant difference between the ratings (*p*=0.746). Another 20 healthy college students (*M*=18.79, *SD*=0.58) were recruited to perform a valence rating task. All negative images with e-AOI drawn were randomly presented for 4 seconds. Notably, all emotive areas were covered in black. Twenty participants rated the valence of each image. Compared with the valence of the entire negative images, participants felt lower levels of unpleasant emotions when the emotive regions were covered (negative: 4.29±0.43, *p*<0.05).

**References**

Lang, P., Bradley, M., & Cuthbert, B. (2008). International affective picture system (IAPS): Affective ratings of pictures and instruction manual. *Technical Report, A-8*.

Qi, S., Basanovic, J., Wang, L., Xiang, S., Hu, W., & Yi, X. (2020). Regulation of negative emotions through positive reappraisal and distancing in high-trait-anxious women. *J Affect Disord, 267*, 191-202. doi:10.1016/j.jad.2020.02.027

Strauss, G. P., Ossenfort, K. L., & Whearty, K. M. (2016). Reappraisal and distraction emotion regulation strategies are associated with distinct patterns of visual attention and differing levels of cognitive demand. *PLoS One, 11*(11), e0162290. doi:10.1371/journal.pone.0162290

***G-CBT intervention protocol***

The protocol consists of eight 120-minute sessions, twice a week: (1) Therapeutic relationship: members and therapist get to know each other, explain the treatment objectives, and establish a trusting patient–therapist relationship. (2) Goal-setting: psycho-education about NSSI involved introducing the relationship between negative emotions and NSSI, and cooperating to set an executable goal. (3) CBT model: explaining the relationship between thoughts, feelings and behaviors, and introducing at-home assignments. (4) Irrational negative beliefs: identifying beliefs that NSSI-related irrational automatic thoughts such as about self-injury always relax the participant; examining the way aspects of NSSI interact and how the performance of previous experiences affects current cognition, emotions, and behavior. (5) Challenge negative automatic thoughts: Socratic questioning, using alternative thoughts, positive self-verbalization, keeping a positive diary. (6) Emotion regulation: practicing adaptive emotion regulation skills (e.g., cognitive reappraisal and distraction), multiple perspectives, rebuilding suitable and flexible cognitive models, and reducing avoidance behavior. (7) Skills training: using existing skills, learning new skills, sharing effective social skills, replacing the NSSI behaviors with other adaptive approaches. (8) Summary: evaluating performance and gains, setting future objectives, and dealing with final departure.

***Risk Mitigation***

After exposure to negative emotional stimuli and discussions of NSSI, participants received a brief debriefing session. Grounding and relaxation techniques (e.g., five-sense grounding, deep breathing exercises) were provided to help participants regulate emotional distress. If participants exhibited persistent emotional distress, difficulty returning to baseline, or reported current self-injury ideation or urges, they were immediately evaluated by a trained clinician. When additional support was required, they were referred to the hospital’s psychological outpatient services for further assessment and intervention.
